# Supplementary material
Source: Springer Nature journal article supplement (https://www.springermedizin.de/resource/supplementary/12943_2009_521_MOESM4_ESM.pdf/9555004)
Supplement: MOESM4 [file 9555004]

A



B



C



D
